# Supplementary material for: Identification of reliable reference genes for qRT-PCR studies of the developing mouse mammary gland
Source: PubMed Central journal article supplement (PMC5067587; doi:10.1038/srep35595), 2016-10-18
Supplement: srep35595-s1.pdf [file srep35595-s1.pdf]

# **Identification of reliable reference genes for qRT-PCR studies of the developing mouse mammary gland**

Anoeska Agatha Alida van de Moosdijk and Renée van Amerongen

## **Supplementary Files**

- [Supplementary Figure S1 \(this PDF\)](#)
- [Supplementary Figure S2 \(this PDF\)](#)
- [Supplementary Table S1 \(uploaded separately as an .xlsx file\)](#)
- [Supplementary Table S2 \(this PDF\)](#)

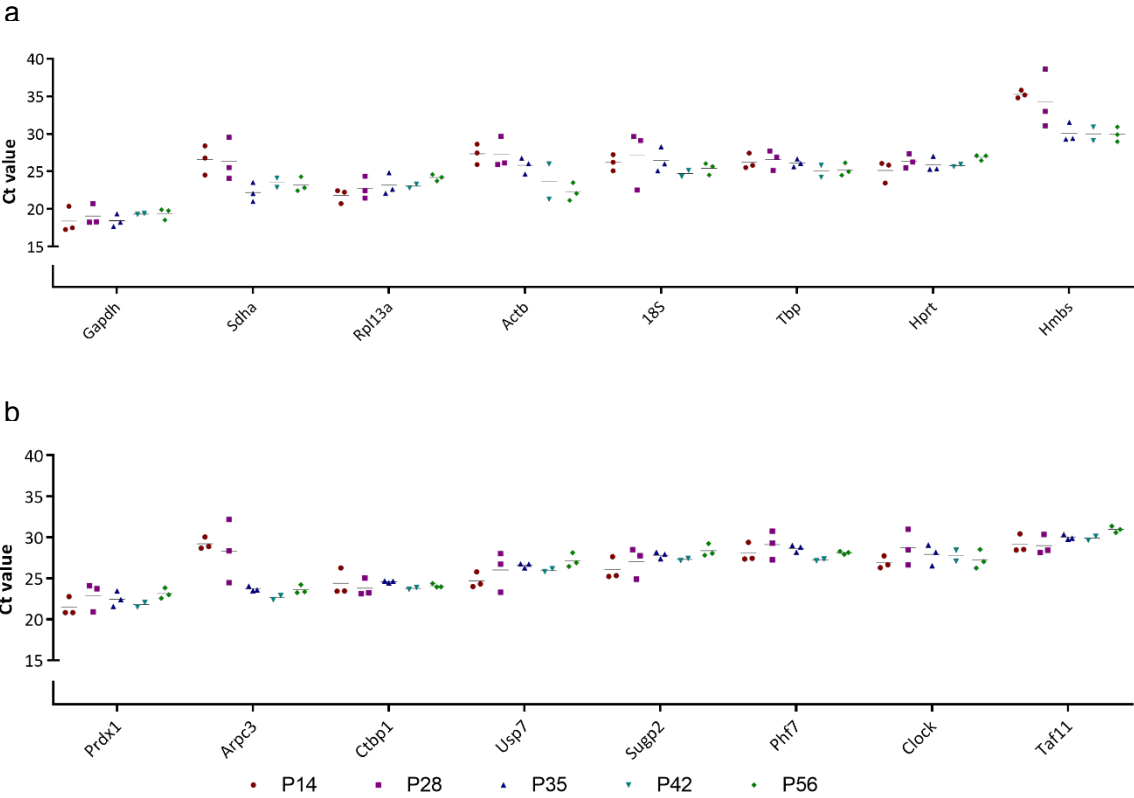

**Supplementary figure S1. Ct values and reference gene ranking for #3 mammary gland.** Scatter plot depicting spread in expression of candidate reference genes in different stages of the #3 mouse mammary gland. a) Traditional reference genes b) Novel candidate reference genes.

van de Moosdijk et al., Supplementary Figure S2

(A)

| Ranking Order (Better--Good--Average)             |               |            |             |              |            |             |             |             |
|---------------------------------------------------|---------------|------------|-------------|--------------|------------|-------------|-------------|-------------|
| Method                                            | 1             | 2          | 3           | 4            | 5          | 6           | 7           | 8           |
| <a href="#">Delta CT</a>                          | Tbp           | Rpl13a     | Hprt        | 18S          | Gapdh      | Sdha        | Actb        | Hmbs        |
| <a href="#">BestKeeper</a>                        | Rpl13a        | Tbp        | Hprt        | Gapdh        | 18S        | Sdha        | Actb        | Hmbs        |
| <a href="#">Normfinder</a>                        | Tbp           | Rpl13a     | Hprt        | 18S          | Sdha       | Gapdh       | Actb        | Hmbs        |
| GeNorm qBase                                      | Rpl13a        | Hprt       | Gapdh       | Tbp          | 18S        | Sdha        | Actb        | Hmbs        |
| <a href="#">Recommended comprehensive ranking</a> | <b>Rpl13a</b> | <b>Tbp</b> | <b>Hprt</b> | <b>Gapdh</b> | <b>18S</b> | <b>Sdha</b> | <b>Actb</b> | <b>Hmbs</b> |
|                                                   |               |            |             |              |            |             |             |             |

(B)

| Ranking Order (Better--Good--Average)             |              |             |              |              |             |              |              |              |
|---------------------------------------------------|--------------|-------------|--------------|--------------|-------------|--------------|--------------|--------------|
| Method                                            | 1            | 2           | 3            | 4            | 5           | 6            | 7            | 8            |
| <a href="#">Delta CT</a>                          | Prdx1        | Sugp2       | Ctbp1        | Phf7         | Usp7        | Taf11        | Clock        | Arpc3        |
| <a href="#">BestKeeper</a>                        | Prdx1        | Ctbp1       | Phf7         | Sugp2        | Taf11       | Usp7         | Clock        | Arpc3        |
| <a href="#">Normfinder</a>                        | Prdx1        | Phf7        | Ctbp1        | Sugp2        | Clock       | Usp7         | Taf11        | Arpc3        |
| GeNorm qBase                                      | Phf7         | Prdx1       | Ctbp1        | Sugp2        | Usp7        | Taf11        | Clock        | Arpc3        |
| <a href="#">Recommended comprehensive ranking</a> | <b>Prdx1</b> | <b>Phf7</b> | <b>Ctbp1</b> | <b>Sugp2</b> | <b>Usp7</b> | <b>Taf11</b> | <b>Clock</b> | <b>Arpc3</b> |
|                                                   |              |             |              |              |             |              |              |              |

**Supplementary Figure S2.**

Comprehensive ranking of the old/traditional (A) and novel candidate reference genes (B) using RefFinder (available at <http://fulxie.0fees.us/?type=reference>). A combined comprehensive ranking of both the traditional and novel candidate genes is presented in Table 1.

| Gene name              | Accession Number | Primer sequence (5' – 3')                                        | Amplicon length | PCR Efficiency % |
|------------------------|------------------|------------------------------------------------------------------|-----------------|------------------|
| <b>Reference genes</b> |                  |                                                                  |                 |                  |
| <i>18S</i>             | NR_003278        | F: CCGCCGCCATGTCTCTAGT<br>R: CTTTCCTCAACACCACATGAGC              | 150 bp          | 90               |
| <i>Arpc3</i>           | NM_019824        | F: TGAAGCGGACAGGACATTGAT<br>R: AGTTGGTGATTCTAGCGTGT              | 122 bp          | 92               |
| <i>Actb</i>            | NM_007393        | F: GAGCTGCCTGACGGCCAGGT<br>R: TACTCCTGCTTGCTGATCCA               | 365 bp          | 72               |
| <i>Clock</i>           | NM_001289826     | F: TTTACAGGCGTTGTTGATTGGA<br>R: ACGCAAGGCCGTCTTCTG               | 92 bp           | 97               |
| <i>Ctbp1</i>           | NM_001198859     | F: GTGCCCTGATGTACCATACCA<br>R: GCCAATTCGGACGATGATTCTA            | 83 bp           | 92               |
| <i>Gapdh</i>           | NM_001289726     | F: CTGGTGCTGCCAAGGCT<br>R:<br>CTGCTTCACCACCTTCTTGATGTC<br>ATCATA | 161 bp          | 99               |
| <i>Hmbs</i>            | NM_013551        | F: GCCCATGTGCCTTCAGTC<br>R: TCTTTGAGCCGTTTTCTCCGC                | 151 bp          | 101              |
| <i>Hprt</i>            | NM_013556        | F: TGTTGTTGGATATGCCCTTG<br>R: TTGCGCTCATCTTAGGCTTT               | 108 bp          | 97               |
| <i>Phf7</i>            | NM_027949        | F: TGTTTGCCTTCTATGCCTTCAA<br>R:<br>GGCAGTCTGCTAGACAGGATAAG       | 114 bp          | 88               |
| <i>Prdx1</i>           | NM_011034        | F:<br>AATGCAAAAATTGGGTATCCTGC<br>R:<br>CGTGGGACACACAAAAGTAAAGT   | 150 bp          | 96               |
| <i>Rpl13a</i>          | NM_009438        | F: CCCTCCACCCTATGACAAGA<br>R: GCCCCAGGTAAGCAAACCTT               | 95 bp           | 101              |
| <i>Sdha</i>            | NM_023281        | F: GTTGCTGTGTGGCTGATCG<br>R: GCACAGTGCAATGACACCAC                | 149 bp          | 89               |
| <i>Sugp2</i>           | NM_001168290     | F: TGACCAGAGGCCGATCTCTAA<br>R:<br>GGAAGTAATACGACTGGCAACAG        | 158 bp          | 105              |
| <i>Tbp</i>             | NM_013684        | F: GTCATTTTCTCCGAGTGCC<br>R: GCTGTTGTTCTGGTCCATGAT               | 151 bp          | 94               |
| <i>Taf11</i>           | NM_026836        | F: GATGGAGACGCGGACTTGAAA<br>R:<br>GCAGGAGTAAGTAAGGACGAGTT        | 113 bp          | 99               |
| <i>Usp7</i>            | NM_001003918     | F: CCACAAGGAAAACGACTGGG<br>R: GTAACACGTTGCTCCCTGATT              | 196 bp          | 88               |
| <b>Target genes</b>    |                  |                                                                  |                 |                  |
| <i>Wnt4</i>            | NM_009523        | F: ACTGGACTCCCTCCCTGTCT<br>R: TGCCCTTGCTACTGCAAA                 | 109 bp          | 97               |

**Supplementary table S2. Overview of all genes and primer sequences used in this study.** The length of the amplicon and the efficiency of the primers is also listed.
